# Supplementary material
Source: PubMed Central journal article supplement (PMC2040392)

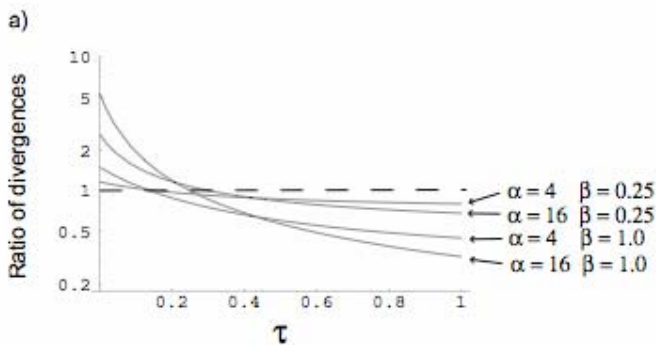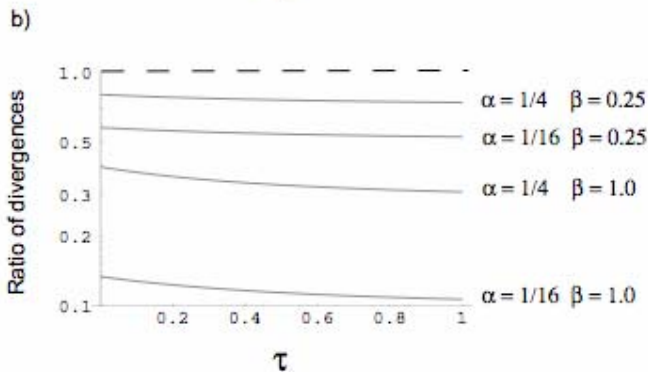

Supplement: pnas_0705456104_1.pdf [file pnas_0705456104_1.pdf]
